# Supplementary material for: PI(4,5)P2 alleviates colitis by inhibiting intestinal epithelial cell pyroptosis through NNMT-mediated RBP4 m6A modification
Source: PubMed Central journal article supplement (PMC11661994; doi:10.1038/s41419-024-07276-3), 2024-12-20

Figure 4B

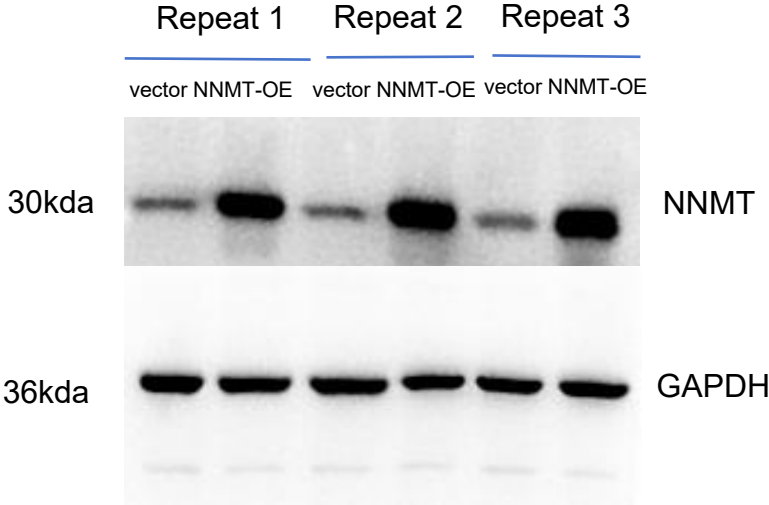

Figure 4G

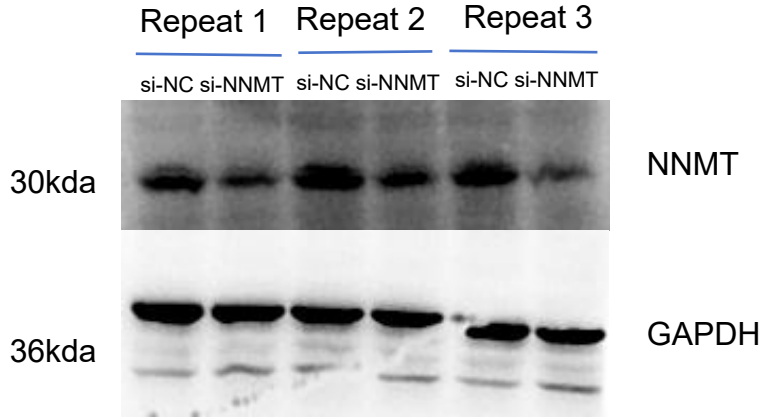

Figure 5H

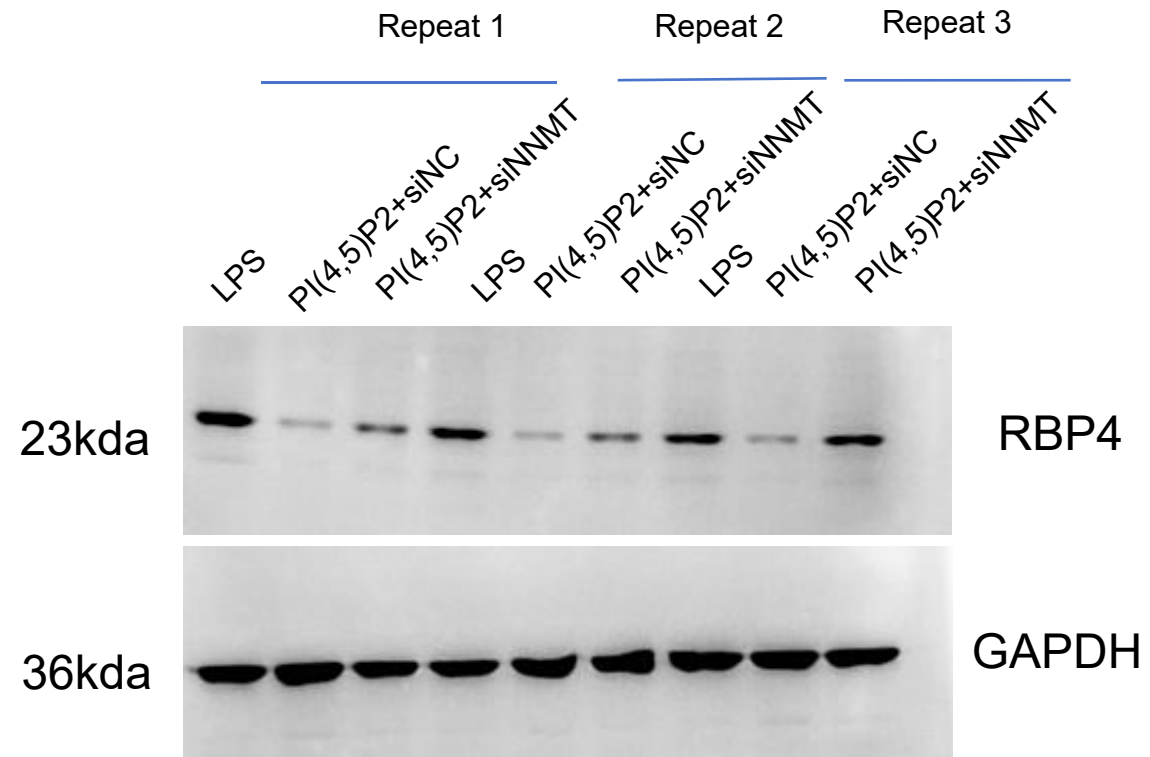

Figure 6C

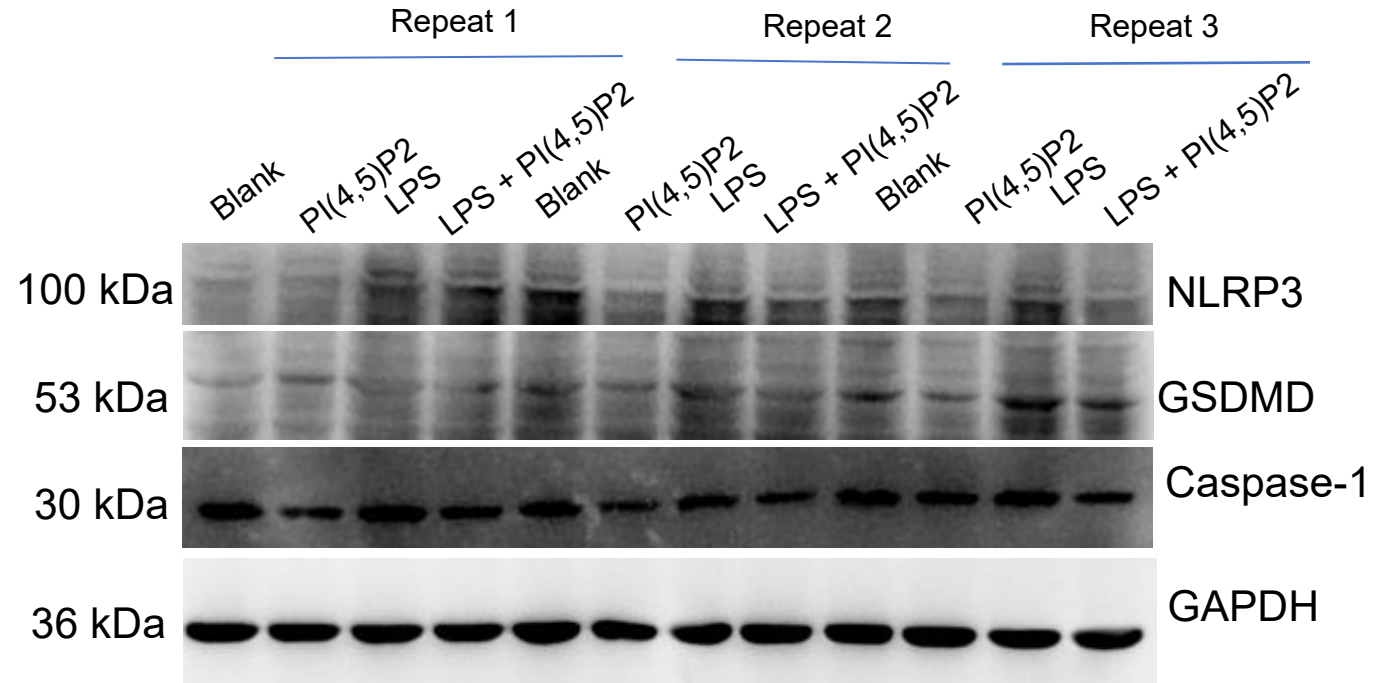

Figure 6F

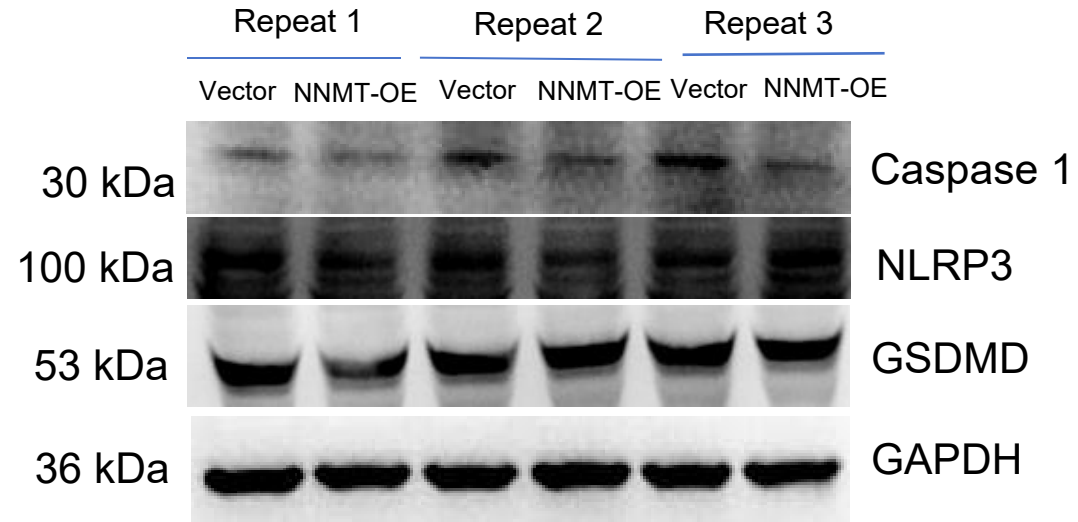

Figure 7A

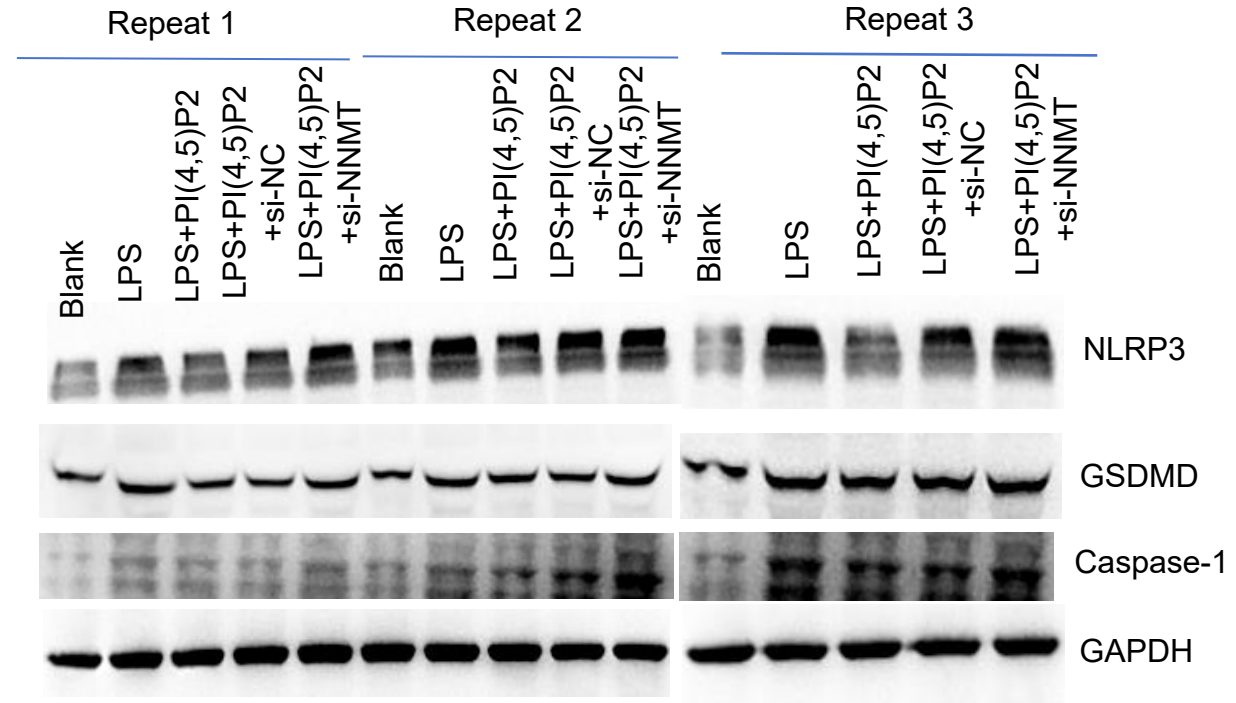

Figure 8B

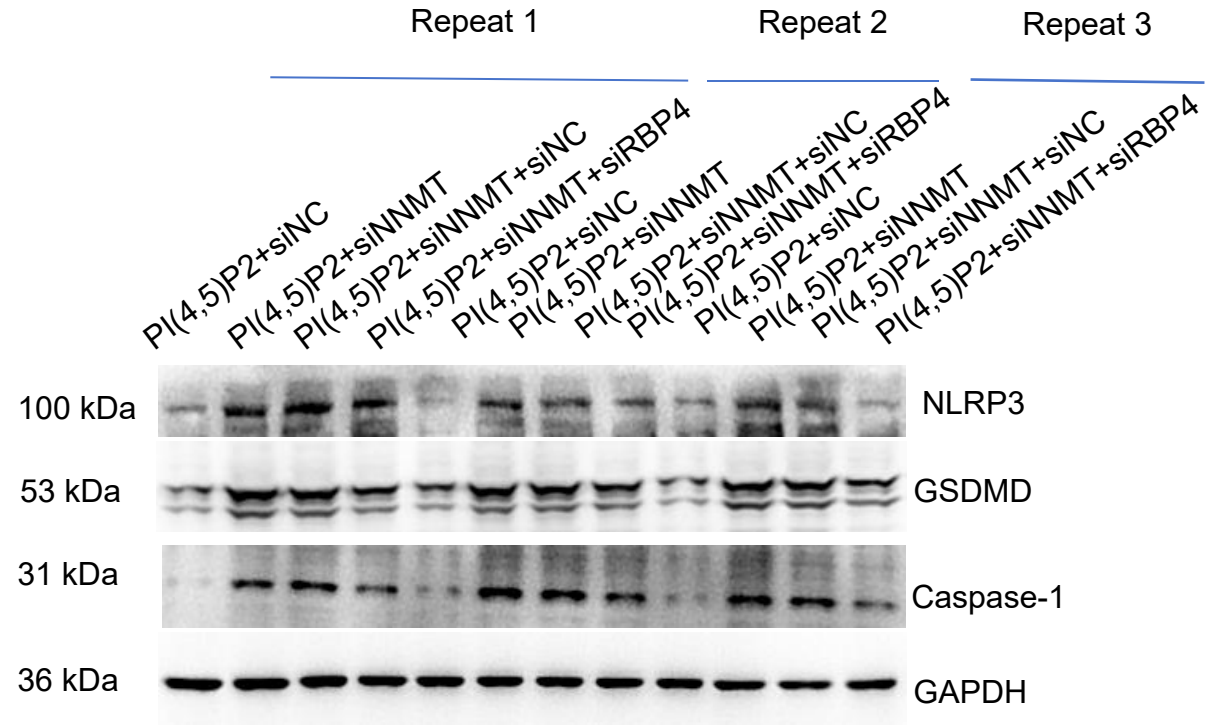

Supplement: 41419_2024_7276_MOESM2_ESM.pdf [file 41419_2024_7276_MOESM2_ESM.pdf]
